# Supplementary material
Source: PubMed Central journal article supplement (PMC9668614)
Supplement: mmc1.pdf [file mmc1.pdf]

# Effects of hyperbaric oxygen therapy on functional and structural connectivity in post-COVID-19 condition patients: a prospective randomized, sham-controlled trial

Merav Catalogna<sup>a</sup>, Efrat Sasson<sup>a</sup>, Amir Hadanny<sup>a,b</sup>, Yoav Parag<sup>a</sup>, Shani Zilberman-Itskovich<sup>a,b</sup>,  
and Shai Efrati<sup>a,b,c\*</sup>

<sup>a</sup>Sagol Center for Hyperbaric Medicine and Research, Shamir (Assaf Harofeh) Medical Center, Zerifin, Israel

<sup>b</sup>Sackler School of Medicine, Tel- Aviv University, Tel-Aviv, Israel

<sup>c</sup>Sagol School of Neuroscience, Tel-Aviv University, Tel-Aviv, Israel.

## SUPPLEMENTARY MATERIALS

### Table of contents

|     |                                                                   |   |
|-----|-------------------------------------------------------------------|---|
| 1   | Materials and methods .....                                       | 2 |
| 1.1 | Mathematical definitions of structural connectivity measures..... | 2 |
| 2   | Supplementary Figures .....                                       | 3 |
|     | Fig. S1. Study flowchart .....                                    | 3 |
| 3   | Supplementary Tables.....                                         | 4 |
|     | Table S1: Functional connectivity networks.....                   | 4 |
|     | Table S2: Fazekas score for WM hyperintensities.....              | 5 |
|     | References.....                                                   | 7 |

# 1 Materials and methods

## 1.1 Mathematical definitions of structural connectivity measures

| Measure           | Description                | Equation                                                                                                                                      | Ref    |
|-------------------|----------------------------|-----------------------------------------------------------------------------------------------------------------------------------------------|--------|
| MD                | Mean Diffusivity           | $MD = \langle \lambda \rangle = \frac{1}{3} \sum_{i=1}^3 \lambda_i; \quad i = 1..3$                                                           | [1]    |
| FA                | Fractional Anisotropy      | $FA = \sqrt{\frac{3}{2}} \frac{\sqrt{\sum_{i=1}^3 (\lambda_i - \langle \lambda \rangle)^2}}{\sqrt{\sum_{i=1}^3 \lambda_i^2}}; \quad i = 1..3$ | [1]    |
| RD                | Radial Diffusivity         | $RD = \frac{1}{2} (\lambda_2 + \lambda_3)$                                                                                                    | [1]    |
| AD                | Axial diffusivity          | $\lambda_1$                                                                                                                                   | [1]    |
| CI                | Linear anisotropy index    | $CI = \frac{\lambda_1 - \lambda_2}{3\langle \lambda \rangle}$                                                                                 | [1]    |
| Cp                | Planar anisotropy index    | $Cp = \frac{2(\lambda_2 - \lambda_3)}{3\langle \lambda \rangle}$                                                                              | [1]    |
| Cs                | Spherical anisotropy index | $Cs = \frac{\lambda_3}{3\langle \lambda \rangle}$                                                                                             | [1]    |
| DW <sub>ROI</sub> | Density weight             | $DW_{ROI} = \frac{NT_{ROI}}{A_{ROI}}$                                                                                                         | [2]    |
| E                 | Global efficacy            | $E = \frac{1}{n} \sum_{i \in N} \frac{\sum_{j \in N, j \neq i} d_{ij}^{-1}}{n-1}$                                                             | [3, 4] |

where,

$\lambda_i, i=1..3$ , are the eigenvalues ( $\lambda_1 > \lambda_2 > \lambda_3 > 0$ ) of the diffusion tensor matrix.

$NT_{ROI}$  is the number of tracts passing through an ROI,  $A_{ROI}$  is the area of the ROI

$N$  is the set of all nodes in the network,  $n$  is the number of nodes, and  $d$  is the distance between nodes  $i$  and  $j$ .

## 2 Supplementary Figures

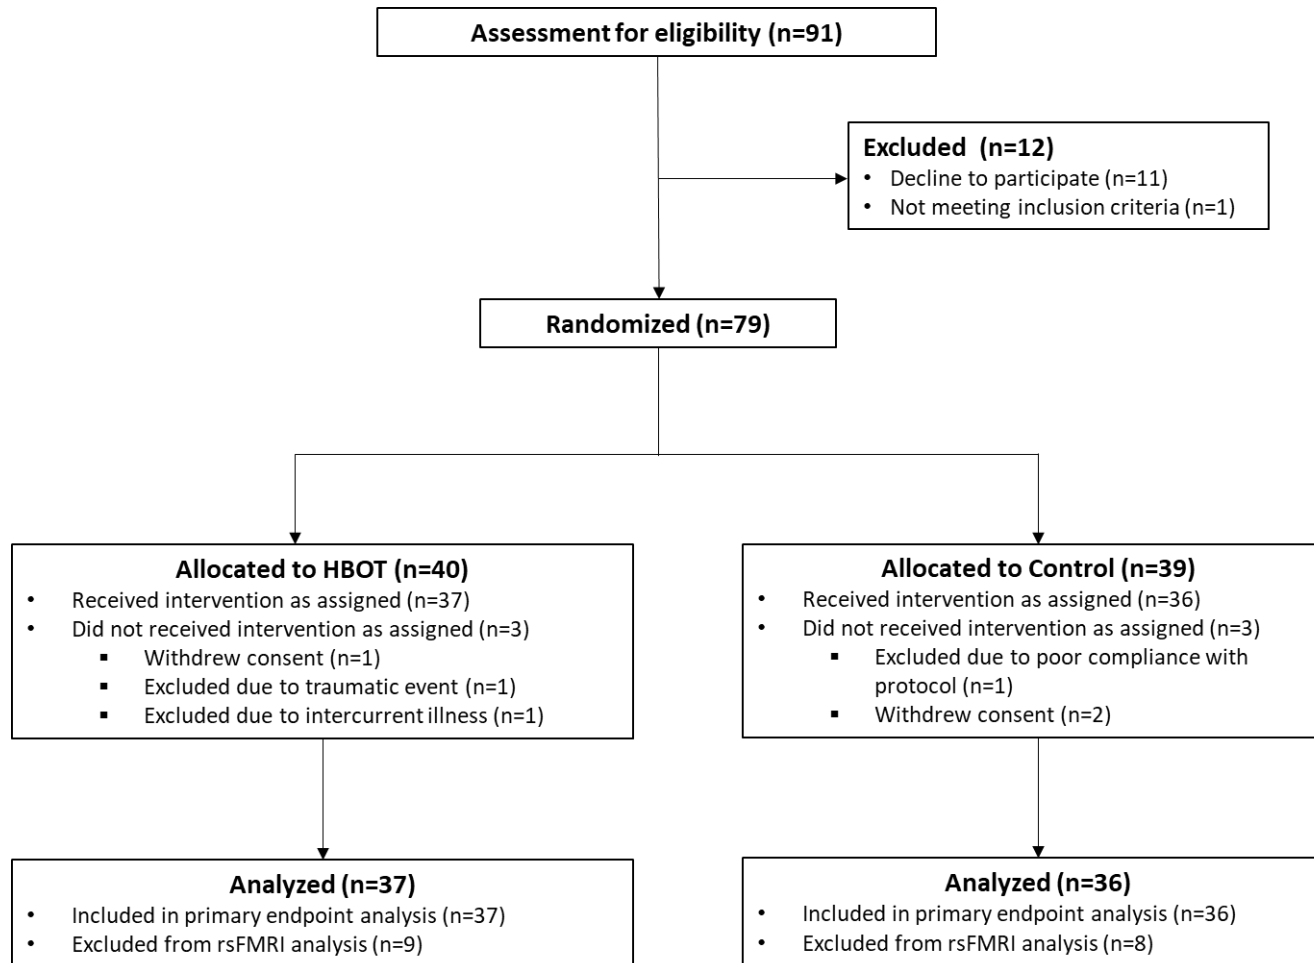

**Fig. S1. Study flowchart**

### 3 Supplementary Tables

**Table S1: Functional connectivity networks with regions of interest and center of mass coordinates**

| Resting-state networks   | ROI                                            | MNI coordinates* |     |     |
|--------------------------|------------------------------------------------|------------------|-----|-----|
|                          |                                                | X                | Y   | Z   |
| Default Mode Network     | Medial Prefrontal Cortex (MPFC)                | 1                | 55  | -3  |
|                          | Left Lateral Parietal (LP)                     | -39              | -77 | 33  |
|                          | Right Lateral Parietal (LP)                    | 47               | -67 | 29  |
|                          | Posterior Cingulate Cortex (PCC)               | 1                | -61 | 38  |
| Sensorimotor Network     | Right Lateral area                             | -55              | -12 | 29  |
|                          | Left Lateral area                              | 56               | -10 | 29  |
|                          | Superior area                                  | 0                | -31 | 67  |
| Salience Network         | Left Anterior Insular Cortex (AInsula)         | -44              | 13  | 1   |
|                          | Right Anterior Insular Cortex (AInsula)        | 47               | 14  | 0   |
|                          | Left Rostral Prefrontal Cortex (RPFC)          | -32              | 45  | 27  |
|                          | Right Rostral Prefrontal Cortex (RPFC)         | 32               | 46  | 27  |
|                          | Left Supramarginal Gyrus (SMG)                 | -60              | -39 | 31  |
|                          | Right Supramarginal Gyrus (SMG)                | 62               | -35 | 32  |
| Dorsal Attention Network | Left Frontal Eye Fields (FEF)                  | -27              | -9  | 64  |
|                          | Right Frontal Eye Fields (FEF)                 | 30               | -6  | 64  |
|                          | Left Intraparietal Sulcus (IPS)                | -39              | -43 | 52  |
|                          | Right Intraparietal Sulcus (IPS)               | 39               | -42 | 54  |
| Fronto Parietal Network  | Left Lateral Prefrontal Cortex (LPFC)          | -43              | 33  | 28  |
|                          | Left Posterior Parietal Cortex (PPC)           | -46              | -58 | 49  |
|                          | Right Lateral Prefrontal Cortex (LPFC)         | 41               | 38  | 30  |
|                          | Right Posterior Parietal Cortex (PPC)          | 52               | -52 | 45  |
| Language Network         | Left Inferior Frontal Gyrus (IFG)              | -51              | 26  | 2   |
|                          | Right Inferior Frontal Gyrus (IFG)             | 54               | 28  | 1   |
|                          | Left posterior Superior Temporal Gyrus (pSTG)  | -57              | -47 | 15  |
|                          | Right posterior Superior Temporal Gyrus (pSTG) | 59               | -42 | 13  |
|                          | Right Insular Cortex (IC)                      | 37               | 3   | 0   |
|                          | Left Insular Cortex (IC)                       | -36              | 1   | 0   |
|                          | Right Hippocampus                              | 26               | -21 | -14 |
|                          | Left Hippocampus                               | -25              | -23 | -14 |
|                          | Right Amygdala                                 | 23               | -4  | -18 |
|                          | Left Amygdala                                  | -23              | -5  | -18 |

\* MNI coordinates correspond to network nodes provided by the CONN toolbox (v.18b) and obtained from the Human Connectome Project [5].

**Table S2: Fazekas score for WM hyperintensities**

| <b>Grade</b> | <b>HBOT</b> | <b>Control</b> | <b>P-VALUE</b> |
|--------------|-------------|----------------|----------------|
| N            | 37          | 36             |                |
| PVWM         |             |                |                |
| Grade 0      | 23          | 24             | 0.687          |
| Grade 1      | 12          | 11             | 0.863          |
| Grade 2      | 2           | 1              | 0.571          |
| DWM          |             |                |                |
| Grade 0      | 17          | 20             | 0.412          |
| Grade 1      | 20          | 15             | 0.289          |
| Grade 2      | 0           | 1              | 1.000          |

PVWM, periventricular white matter; DWM, deep white matter

**Table S3: Group differences in structural connectivity measures: Group-by-time ANOVA model**

|                             | Baseline | Group Main effect of |         | Time Main effect of |         | effect Interaction |              |
|-----------------------------|----------|----------------------|---------|---------------------|---------|--------------------|--------------|
|                             | P-value  | F                    | P-value | F                   | P-value | F                  | P-value      |
| <b>FA</b>                   |          |                      |         |                     |         |                    |              |
| Amygdala (L)                | 0.692    | 0.010                | 0.919   | 0.846               | 0.361   | 7.805              | <b>0.007</b> |
| Amygdala (R)                | 0.031    | 5.084                | 0.028   | 0.107               | 0.745   | 0.257              | 0.614        |
| Hippocampus (L)             | 0.309    | 3.050                | 0.085   | 1.243               | 0.269   | 0.637              | 0.428        |
| Hippocampus (R)             | 0.832    | 0.147                | 0.702   | 1.937               | 0.169   | 0.072              | 0.789        |
| Insula (L)                  | 0.720    | 0.013                | 0.909   | 0.961               | 0.330   | 0.676              | 0.414        |
| Insula (R)                  | 0.488    | 0.551                | 0.460   | 1.001               | 0.321   | 0.038              | 0.847        |
| <b>MD</b>                   |          |                      |         |                     |         |                    |              |
| Amygdala (L)                | 0.855    | 0.272                | 0.604   | 2.736               | 0.103   | 1.204              | 0.277        |
| Amygdala (R)                | 0.844    | 0.025                | 0.875   | 0.114               | 0.737   | 0.953              | 0.333        |
| Hippocampus (L)             | 0.113    | 1.919                | 0.170   | 0.087               | 0.769   | 1.244              | 0.268        |
| Hippocampus (R)             | 0.062    | 1.614                | 0.208   | 0.106               | 0.746   | 3.549              | 0.064        |
| Insula (L)                  | 0.970    | 0.429                | 0.514   | 4.052               | 0.048   | 1.722              | 0.194        |
| Insula (R)                  | 0.162    | 1.256                | 0.266   | 0.158               | 0.692   | 0.824              | 0.367        |
| <b>RD</b>                   |          |                      |         |                     |         |                    |              |
| Amygdala (L)                | 0.758    | 0.132                | 0.717   | 1.456               | 0.232   | 4.815              | 0.032        |
| Amygdala (R)                | 0.300    | 1.018                | 0.317   | 0.006               | 0.939   | 1.150              | 0.288        |
| Hippocampus (L)             | 0.085    | 3.083                | 0.084   | 0.674               | 0.414   | 0.513              | 0.476        |
| Hippocampus (R)             | 0.082    | 1.667                | 0.201   | 0.020               | 0.888   | 2.669              | 0.107        |
| Insula (L)                  | 0.892    | 0.347                | 0.558   | 2.867               | 0.095   | 2.676              | 0.106        |
| Insula (R)                  | 0.182    | 1.353                | 0.249   | 0.010               | 0.922   | 0.757              | 0.387        |
| <b>RA</b>                   |          |                      |         |                     |         |                    |              |
| Amygdala (L)                | 0.933    | 0.291                | 0.592   | 3.253               | 0.076   | 0.251              | 0.618        |
| Amygdala (R)                | 0.435    | 0.545                | 0.463   | 0.525               | 0.471   | 0.300              | 0.586        |
| Hippocampus (L)             | 0.197    | 0.652                | 0.422   | 0.095               | 0.758   | 2.068              | 0.155        |
| Hippocampus (R)             | 0.056    | 1.292                | 0.260   | 0.680               | 0.412   | 4.328              | 0.041        |
| Insula (L)                  | 0.826    | 0.475                | 0.493   | 4.112               | 0.046   | 0.646              | 0.424        |
| Insula (R)                  | 0.224    | 0.796                | 0.376   | 0.801               | 0.374   | 0.569              | 0.453        |
| <b>CI</b>                   |          |                      |         |                     |         |                    |              |
| Amygdala (L)                | 0.758    | 0.104                | 0.748   | 0.076               | 0.784   | 8.452              | <b>0.005</b> |
| Amygdala (R)                | 0.300    | 3.257                | 0.076   | 0.472               | 0.494   | 0.390              | 0.535        |
| Hippocampus (L)             | 0.085    | 2.484                | 0.120   | 3.274               | 0.075   | 1.327              | 0.253        |
| Hippocampus (R)             | 0.082    | 0.122                | 0.728   | 6.614               | 0.012   | 1.406              | 0.240        |
| Insula (L)                  | 0.892    | 0.002                | 0.961   | 0.607               | 0.438   | 0.785              | 0.379        |
| Insula (R)                  | 0.182    | 0.006                | 0.939   | 0.720               | 0.399   | 0.053              | 0.818        |
| <b>Cs</b>                   |          |                      |         |                     |         |                    |              |
| Amygdala (L)                | 0.482    | 0.100                | 0.752   | 1.852               | 0.178   | 5.707              | 0.020        |
| Amygdala (R)                | 0.026    | 5.871                | 0.018   | 0.009               | 0.926   | 0.077              | 0.782        |
| Hippocampus (L)             | 0.255    | 2.625                | 0.110   | 0.044               | 0.834   | 0.171              | 0.681        |
| Hippocampus (R)             | 0.391    | 0.367                | 0.546   | 0.252               | 0.617   | 0.768              | 0.384        |
| Insula (L)                  | 0.902    | 0.234                | 0.630   | 1.644               | 0.204   | 0.266              | 0.608        |
| Insula (R)                  | 0.200    | 1.862                | 0.177   | 0.858               | 0.357   | 0.262              | 0.611        |
| <b>Cp</b>                   |          |                      |         |                     |         |                    |              |
| Amygdala (L)                | 0.407    | 0.850                | 0.360   | 3.390               | 0.070   | 0.383              | 0.538        |
| Amygdala (R)                | 0.251    | 2.947                | 0.091   | 1.049               | 0.310   | 0.073              | 0.788        |
| Hippocampus (L)             | 0.520    | 0.135                | 0.714   | 4.396               | 0.040   | 0.744              | 0.391        |
| Hippocampus (R)             | 0.171    | 0.187                | 0.667   | 13.292              | 0.001   | 6.502              | 0.013        |
| Insula (L)                  | 0.437    | 0.425                | 0.517   | 1.184               | 0.280   | 0.337              | 0.564        |
| Insula (R)                  | 0.013    | 5.401                | 0.023   | 0.265               | 0.608   | 1.639              | 0.205        |
| <b>Average tract length</b> |          |                      |         |                     |         |                    |              |
| Amygdala (L)                | 0.631    | 0.324                | 0.571   | 0.063               | 0.803   | 7.642              | <b>0.007</b> |
| Amygdala (R)                | 0.128    | 1.381                | 0.244   | 2.148               | 0.148   | 0.501              | 0.482        |
| Hippocampus (L)             | 0.647    | 0.894                | 0.348   | 7.667               | 0.007   | 0.388              | 0.535        |
| Hippocampus (R)             | 0.430    | 0.201                | 0.655   | 2.591               | 0.112   | 0.930              | 0.338        |
| Insula (L)                  | 0.810    | 0.184                | 0.669   | 0.116               | 0.735   | 0.026              | 0.873        |
| Insula (R)                  | 0.341    | 1.075                | 0.303   | 2.012               | 0.161   | 0.004              | 0.950        |

| <b>Density weight</b>       |       |       |       |       |       |       |       |
|-----------------------------|-------|-------|-------|-------|-------|-------|-------|
| Amygdala (L)                | 0.735 | 0.093 | 0.761 | 0.496 | 0.484 | 5.366 | 0.024 |
| Amygdala (R)                | 0.053 | 3.809 | 0.056 | 0.145 | 0.705 | 0.029 | 0.866 |
| Hippocampus (L)             | 0.456 | 1.562 | 0.216 | 2.666 | 0.107 | 0.192 | 0.662 |
| Hippocampus (R)             | 0.467 | 0.100 | 0.753 | 0.521 | 0.473 | 2.252 | 0.138 |
| Insula (L)                  | 0.552 | 0.320 | 0.573 | 0.549 | 0.461 | 0.066 | 0.797 |
| Insula (R)                  | 0.378 | 0.649 | 0.423 | 0.162 | 0.688 | 0.120 | 0.730 |
| <b>Efficacy</b>             |       |       |       |       |       |       |       |
| Amygdala (L)                | 0.343 | 0.149 | 0.701 | 1.324 | 0.254 | 5.980 | 0.017 |
| Amygdala (R)                | 0.605 | 0.266 | 0.608 | 0.530 | 0.469 | 0.019 | 0.892 |
| Hippocampus (L)             | 0.756 | 1.487 | 0.227 | 0.536 | 0.467 | 1.644 | 0.204 |
| Hippocampus (R)             | 0.357 | 1.315 | 0.255 | 6.470 | 0.013 | 0.061 | 0.805 |
| Insula (L)                  | 0.255 | 0.707 | 0.403 | 0.023 | 0.879 | 0.513 | 0.476 |
| Insula (R)                  | 0.446 | 0.935 | 0.337 | 0.022 | 0.883 | 0.057 | 0.812 |
| <b>Whole brain density</b>  | 0.214 | 0.006 | 0.94  | 2.036 | 0.158 | 2.702 | 0.105 |
| <b>Whole brain efficacy</b> | 0.484 | 0.33  | 0.567 | 0.52  | 0.472 | 0.24  | 0.628 |

Fractional anisotropy (FA), mean diffusion (MD), radial diffusion (RD), axial diffusivity (AD), linear anisotropy (Cl), planar anisotropy (Cp), and spherical anisotropy (Cs)

## References

1. Alexander, A.L., et al., A geometric analysis of diffusion tensor measurements of the human brain. 2000. **44**(2): p. 283-291.
2. Hagmann, P., et al., Mapping the structural core of human cerebral cortex. 2008. **6**(7): p. e159.
3. Latora, V. and M.J.P.r.l. Marchiori, Efficient behavior of small-world networks. 2001. **87**(19): p. 198701.
4. Rubinov, M. and O.J.N. Sporns, Complex network measures of brain connectivity: uses and interpretations. 2010. **52**(3): p. 1059-1069.
5. Smith, S.M., et al., Resting-state fMRI in the human connectome project. 2013. **80**: p. 144-168.
